## ANATOMIC STUDIES

All animals appeared well nourished. The lungs of one rabbit revealed suppurative bronchopneumonia and small focal hepatic abscesses. This inflammatory process was interpreted as being unrelated to the experimental procedure. A slight focal encephalitis of the type that is endemic in the stock of rabbits used was encountered in one other animal. Otherwise, the animals were free of gross or microscopic lesions. There was no evidence of old or recent cellular injury to parenchymatous tissues. The nervous systems were free of degenerative changes, and the hematopoietic tissues were normally active and full.

## SUMMARY

One dog, 3 rabbits and 3 rats were exposed continuously to trichloroethylene vapor in concentrations of 0.05 to 0.1 volumes per cent for periods averaging eighteen hours daily over a three month interval. This prolonged exposure produced no observable functional or anatomic adverse effects.

## REFERENCES

1. Armstrong, D. M.: Assessment of Liver Damage Following Trichlorethylene and Diethyl Ether Anesthesia, *Anesthesia* 2: No. 2 (1947).
2. Scifter, J.: Liver Injury in Dogs Exposed to Trichlorethylene, *J. Indust. Hyg. & Toxicol.* 26: 250-52 (Sept.) 1944.
3. Nowill, W. K.; Stephen, C. R., and Searles, P. W.: Evaluation of Trichlorethylene as Anesthetic and Analgesic Agent, *Arch. Surg.* 66: 35-47 (Jan.) 1953.
4. Hamilton, Alice: *Industrial Toxicology*, New York, Harper Bros., 1934.
5. Browning, E.: Toxicity of Industrial Organic Solvents, Report No. 80, Ind. Health Res. Board M. Res. Council, London, 1937.
6. McAnley, J.: Trichlorethylene and Trigeminal Anesthesia, *Brit. M. J.* 2: 713-714 (Dec. 4) 1943.
7. Hall, K. D.; Garlington, L. N.; Nowill, W. K., and Stephen, C. R.: Analysis of Small Concentrations of Trichloroethylene Vapor by Interferometry, *Anesthesiology* 14: 38-45 (Jan.) 1953.

## NOTICE OF THE ANNUAL MEETING

The American Society of Anesthesiologists, Inc.

October 25-30, 1954

Cincinnati, Ohio
